# Supplementary material
Source: Royal Society of Chemistry journal article supplement (doi:10.1039/d6ta00551a)
Supplement: d6ta00551a1.pdf [file d6ta00551a1.pdf]

## Bio-inspired spiral-structured poly(vinyl alcohol)/liquid metal/ carbon nanofiber composites for efficient thermal management

Zhuo Wen<sup>1</sup>, Yilin Liu<sup>1</sup>, Xinyin Zhang, Yuntong Xie, Ting Gu\*

Provincial Guizhou Key Laboratory of Green Chemical and Clean Energy Technology, School of Chemistry and Chemical Engineering, Guizhou University, Guiyang 550025, Guizhou, China

**Table S1** Formulations of S-PVA/LM<sub>x</sub>-CNFs composite films with different LM content.

| Sample                        | PVA (g) | LM (g) | CNFs (g) |
|-------------------------------|---------|--------|----------|
| S-PVA/LM <sub>4.5</sub> CNFs  | 6.30    | 1.43   | 0.20     |
| S-PVA/LM <sub>6.5</sub> CNFs  | 6.30    | 2.11   | 0.20     |
| S-PVA/LM <sub>8.5</sub> CNFs  | 6.30    | 2.82   | 0.20     |
| S-PVA/LM <sub>10.5</sub> CNFs | 6.30    | 3.56   | 0.20     |
| S-PVA/LM <sub>12.5</sub> CNFs | 6.30    | 4.33   | 0.20     |

**Table S2** The detailed  $K_{\perp}$  values for the previously reported flexible polymer-based TIMs are systematically summarized.

| Sample                             | Filler                         | Filler content | $K_{\perp}$ | Ref       |
|------------------------------------|--------------------------------|----------------|-------------|-----------|
| PDMS/BN                            | BN                             | 30 wt%         | 1.24        | 16        |
| WPU/CNT@LM                         | CNT@LM                         | 40 vol%        | 2.19        | 17        |
| PDMS/PW/BN                         | BN                             | 13 wt%         | 2.16        | 18        |
| PDMS/BN/MXene                      | BN/MXene                       | 15 wt%         | 2.03        | 19        |
| PDMS/BN/LM                         | BN/LM                          | 40 wt%         | 2.1         | 20        |
| PVA/SiC/LM                         | SiC/LM                         | 40 wt%         | 0.35        | 21        |
| PVA/Al <sub>2</sub> O <sub>3</sub> | Al <sub>2</sub> O <sub>3</sub> | 50 wt%         | 1.8         | 22        |
| PVA/MXene@Ag                       | MXene@Ag                       | 60 wt%         | 0.41        | 23        |
| PVA/BNNS/MXene                     | BNNS/MXene                     | 30 wt%         | 1.74        | 24        |
| PVA/LM-CNFs                        | LM-CNFs                        | 12.5 vol%      | 2.75        | This work |
| TPU@MD/PVA                         | MDs                            | 39 vol%        | 3.31        | 25        |
| LSR/BN/C-CF                        | BN/C-CF                        | 10 wt%         | 3.32        | 26        |

\* Corresponding author:

E-mail: [tgu@gzu.edu.cn](mailto:tgu@gzu.edu.cn) (T. Gu)

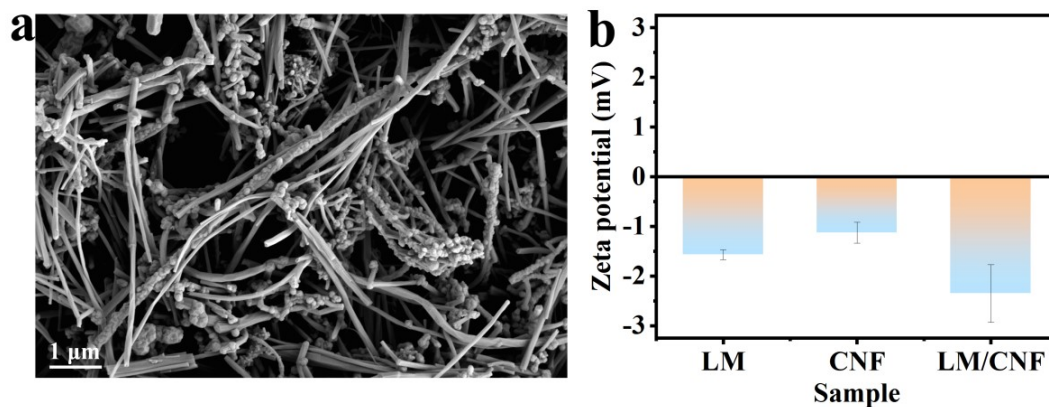

Fig. S1. (a) SEM images of the CNF. (b) Zeta potential of LM, CNF, and LM@CNF.

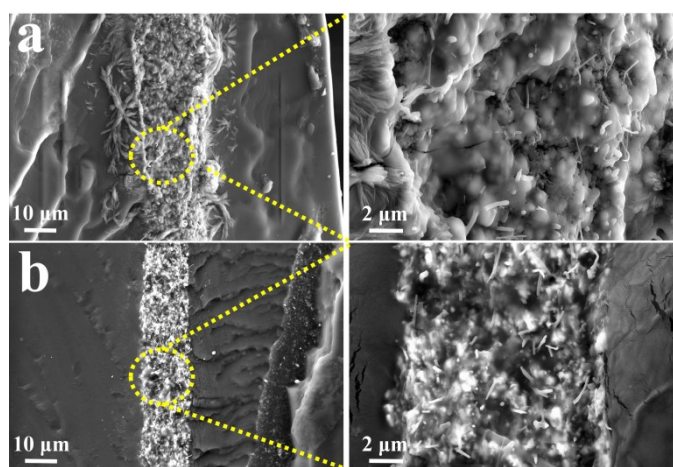

Fig. S2. SEM images of the S-PVA/ LM<sub>12.5</sub>-CNFs composite sample (a) before compression and (b) after compression at 55°C.

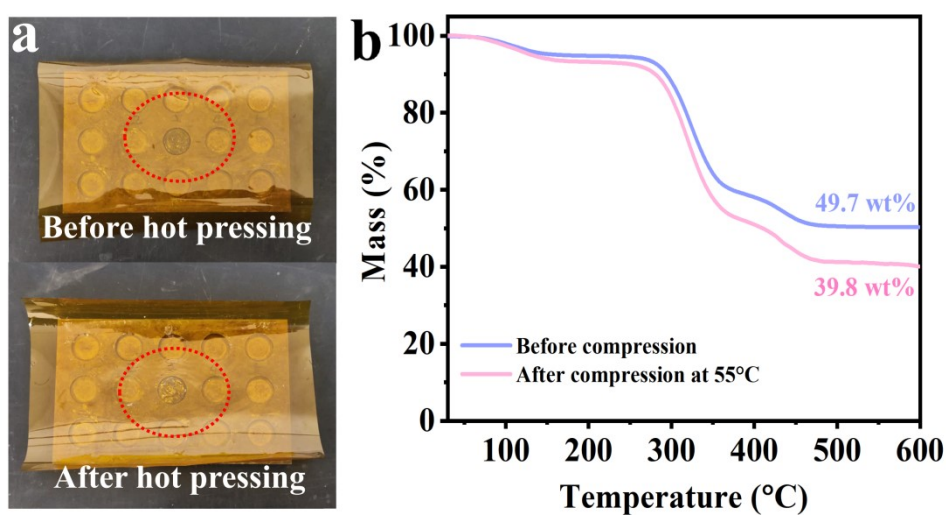

Fig. S3. (a) Digital picture and (b) TG curves of the S-PVA/ LM<sub>12.5</sub>-CNFs composite sample before and after compression at 55°C.

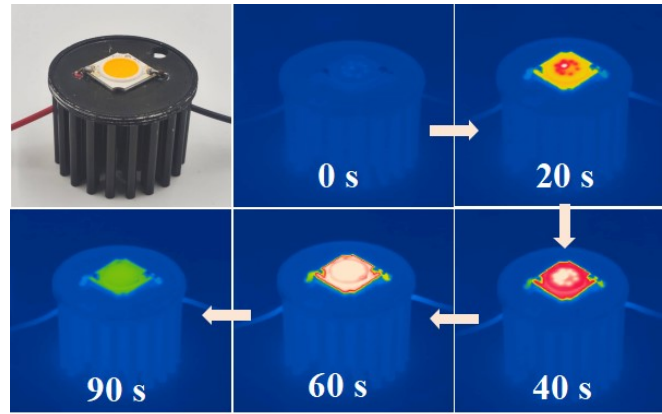

**Fig. S4.** Infrared thermal images of LED chip for absence of a TIM.

### Supplementary method-Finite Element Model

The heat transfer process was simulated using COMSOL Multiphysics 6.1. The models were configured as follows: the chip (heat source) measured  $5\text{ cm} \times 5\text{ cm} \times 0.3\text{ cm}$ ; the TIM  $5\text{ cm} \times 5\text{ cm} \times 0.2\text{ cm}$ ; and the aluminum radiator comprised a  $5\text{ cm} \times 5\text{ cm} \times 0.3\text{ cm}$  base with 10 fins. The thermal conductivity of the aluminum heat sink was set to  $238\text{ W/m}\cdot\text{K}$ . Four cases were analyzed: pure PVA, B-PVA/LM<sub>12.5</sub>/CNFs and S-PVA/LM<sub>12.5</sub>-CNFs as a TIM, along with an ideal contact condition. The thermal conductivities were set as follows:  $0.49\text{ W/m}\cdot\text{K}$  for pure PVA,  $1.02\text{ W/m}\cdot\text{K}$  for B-PVA/LM<sub>12.5</sub>/CNFs, and  $2.75\text{ W/m}\cdot\text{K}$  for S-PVA/LM<sub>12.5</sub>-CNFs. A steady-state finite element analysis was employed. The external boundaries of the chip and TIM were defined as adiabatic. The chip power was  $5.2\text{ W}$ , with an initial uniform temperature of  $297.15\text{ K}$ . A convective heat transfer coefficient of  $3\text{ W}/(\text{m}^2\cdot\text{K})$  was applied to the aluminum radiator, based on a typical value. The ambient temperature and pressure were set to  $296.15\text{ K}$  and  $1\text{ atm}$ , respectively.

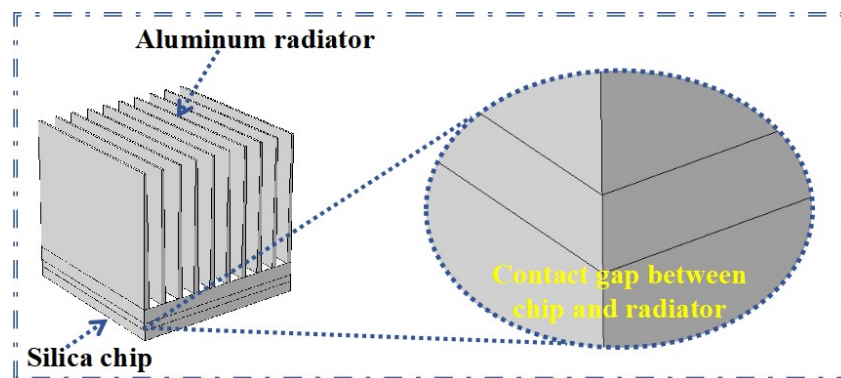

**Fig. S5.** Schematic representation showing the assembly of an aluminum radiator and chip in the finite element

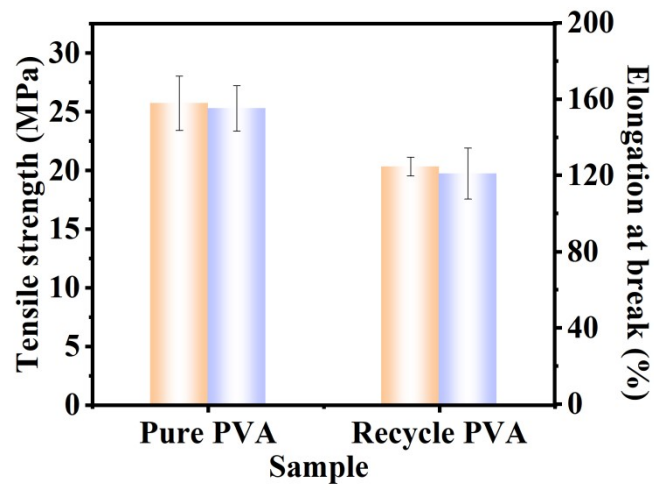

Fig. S6. The tensile strength and elongation at break of S-PVA/ LM<sub>12.5</sub>-CNFs composite .
